# Supplementary material for: Pure red CsPbBr0.96I2.04/SiO2 core/shell nanocrystals with simultaneous high efficiency and stability for Mini-LEDs
Source: Royal Society of Chemistry journal article supplement (doi:10.1039/d3tc01362f), 2023-01-01
Supplement: d3tc01362f1.pdf [file d3tc01362f1.pdf]

## *Supporting Information*

### **Pure Red CsPbBr<sub>0.96</sub>I<sub>2.04</sub>/SiO<sub>2</sub> Core/Shell Nanocrystals with Simultaneous Efficient and High Stability for Mini-LEDs**

*Yixin Cai,<sup>a</sup> Yang Yang,<sup>a</sup> Haorui Dong,<sup>a</sup> Tongtong Xuan,<sup>\*acd</sup> Xueyuan Tang,<sup>\*ae</sup> Rong-  
Jun Xie<sup>\*abcd</sup>*

<sup>a</sup>Fujian Key Laboratory of Surface and Interface Engineering for High Performance Materials, College of Materials, Xiamen University, Xiamen 361005, P. R. China.

<sup>b</sup>State Key Laboratory of Physical Chemistry of Solid Surfaces, Xiamen 361005, P. R. China.

<sup>c</sup>Shenzhen Research Institute of Xiamen University, Shenzhen 518000, P. R. China.

<sup>d</sup>Xiamen Key Laboratory of High Performance Metals and Materials, Xiamen University, Xiamen 361005, P. R. China.

<sup>e</sup>Key Laboratory of High Performance Ceramics Fibers (Xiamen University), Ministry of Education, P. R. China.

\*E-mail: [ttxuan@xmu.edu.cn](mailto:ttxuan@xmu.edu.cn) (T.T. Xuan), [xytang@xmu.edu.cn](mailto:xytang@xmu.edu.cn) (X.Y. Tang),  
[rjxie@xmu.edu.cn](mailto:rjxie@xmu.edu.cn) (R.-J. Xie)

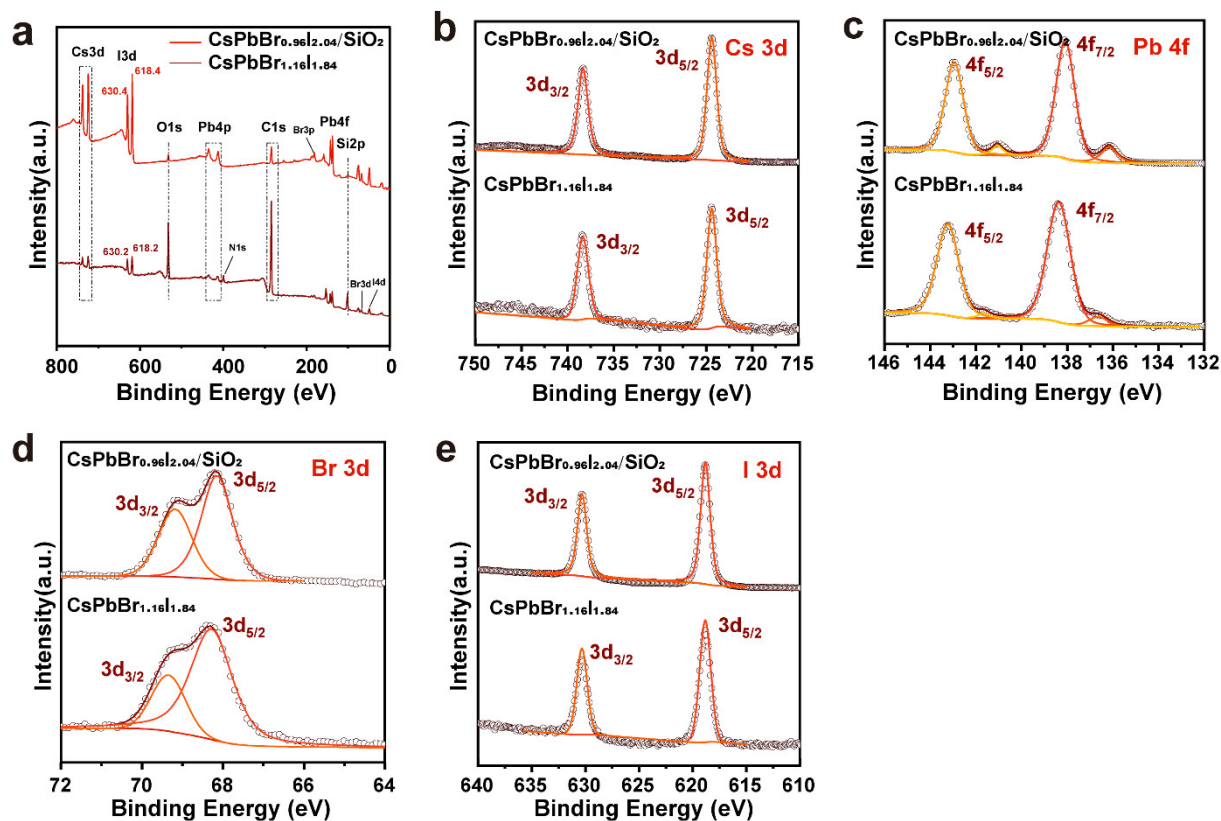

**Figure S1.** (a) XPS spectra of CsPbBr<sub>1.16</sub>I<sub>1.84</sub> NCs and CsPbBr<sub>0.96</sub>I<sub>2.04</sub>/SiO<sub>2</sub> NCs, (b)-(e) High-resolution XPS spectra of CsPbBr<sub>1.16</sub>I<sub>1.84</sub> NCs and CsPbBr<sub>0.96</sub>I<sub>2.04</sub>/SiO<sub>2</sub> NCs for Cs 3d, Pb 4f, I 3d and Br 3d.

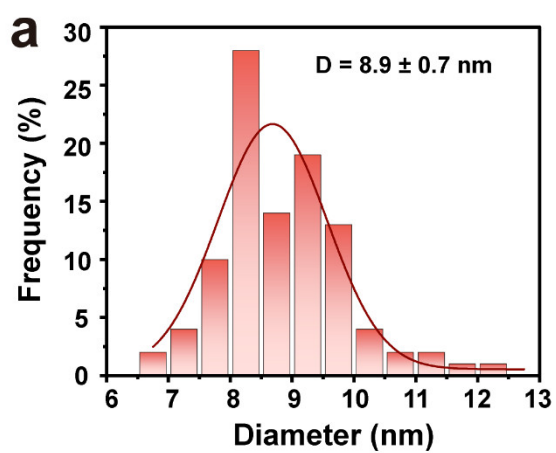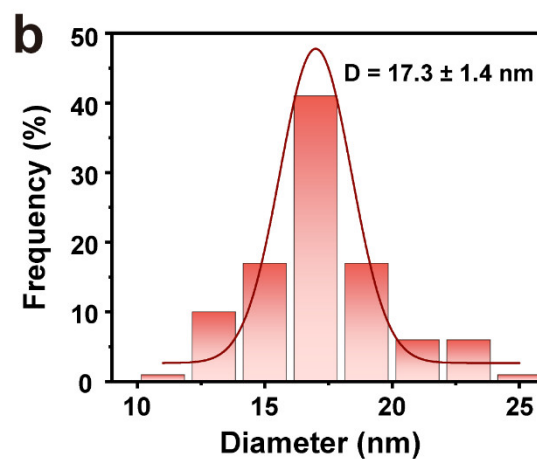

**Figure S2.** Particle size distribution of (a) CsPbBr<sub>1.16</sub>I<sub>1.84</sub> NCs and (b) CsPbBr<sub>0.96</sub>I<sub>2.04</sub>/SiO<sub>2</sub> NCs.

**Table S1.** Optical properties of the pure red NCs.

|                                                            | Emission<br>peak<br>(nm) | FWHM<br>(nm) | $A_1$ | $\tau_1$ (ns) | $A_2$ | $\tau_2$ (ns) | $\tau_{avg}$<br>(ns) |
|------------------------------------------------------------|--------------------------|--------------|-------|---------------|-------|---------------|----------------------|
| CsPbBr <sub>1.16</sub> I <sub>1.84</sub>                   | 632                      | 28           | 0.57  | 134.98        | 0.43  | 375.47        | 254.6                |
| CsPbBr <sub>0.96</sub> I <sub>2.04</sub> /SiO <sub>2</sub> | 631                      | 27           | 0.37  | 372.32        | 0.63  | 1323.72       | 1158.9               |

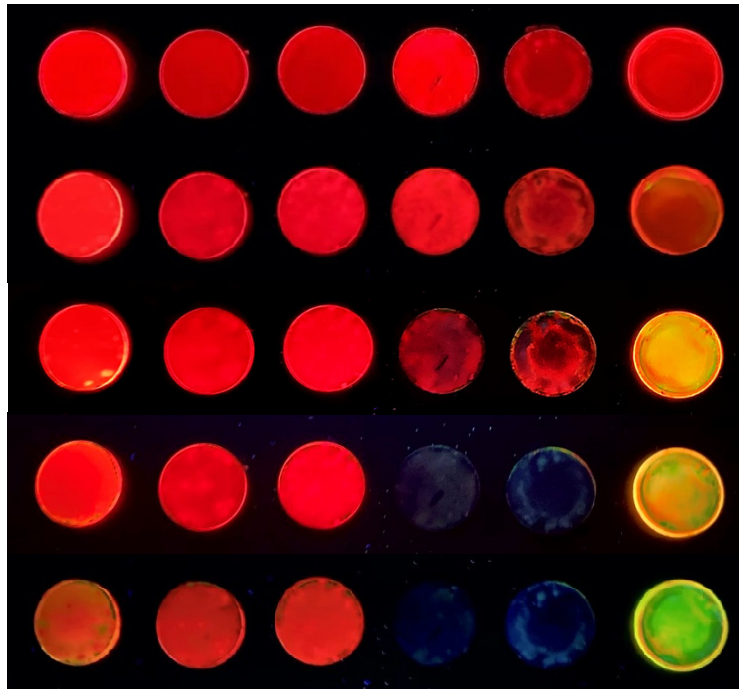

**Figure S3.** Photograph of NC films synthesized with different contents of APTES after aging under ambient conditions for several days.

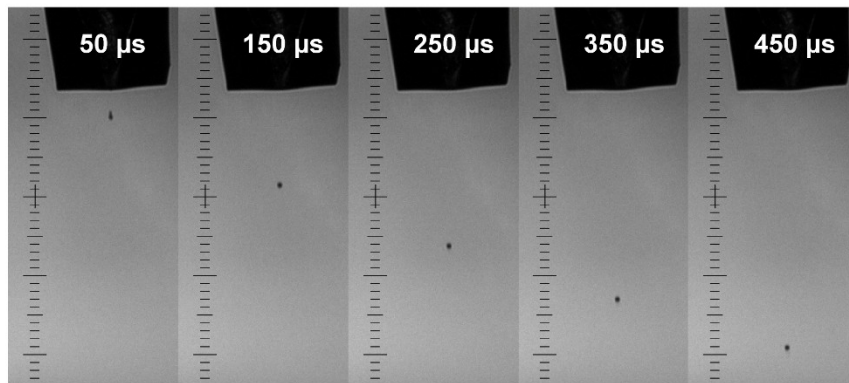

**Figure S4.** Diagram of the falling state of droplets at different times.

**Table S2.** Physical properties of the NC inks.

|       | Solvent                   | Surface tension<br>(mN m <sup>-1</sup> ) | Density<br>(g cm <sup>-3</sup> ) | Viscosity<br>(mPa s) | Contact<br>angle (°) | Z value |
|-------|---------------------------|------------------------------------------|----------------------------------|----------------------|----------------------|---------|
| Ink-0 | Dodecane                  | 25.5                                     | 0.79                             | 1.68                 | 14.2                 | 14.6    |
| Ink-1 | Toluene :                 | 27.1                                     | 0.83                             | 1.21                 | 13.2                 | 17      |
|       | Dodecane<br>(V : V = 4:6) |                                          |                                  |                      |                      |         |
| Ink-2 | Toluene :                 | 27.2                                     | 0.83                             | 1.22                 | 13.1                 | 17      |
|       | Dodecane<br>(V : V = 4:6) |                                          |                                  |                      |                      |         |

The Z value is an empirical formula used to evaluate the compatibility of ink with nozzle material and size, which can be expressed as the following formula:<sup>1</sup>

$$Z = \frac{l}{Oh} = \frac{\sqrt{\gamma\rho a}}{\eta}$$

where  $\gamma$  is the surface tension (mN/m),  $\rho$  is the density (g/cm<sup>3</sup>),  $\eta$  is the viscosity (mPa·s),  $a$  is the nozzle diameter ( $\mu$ m), and  $Oh$  is the Ohnesorge number.

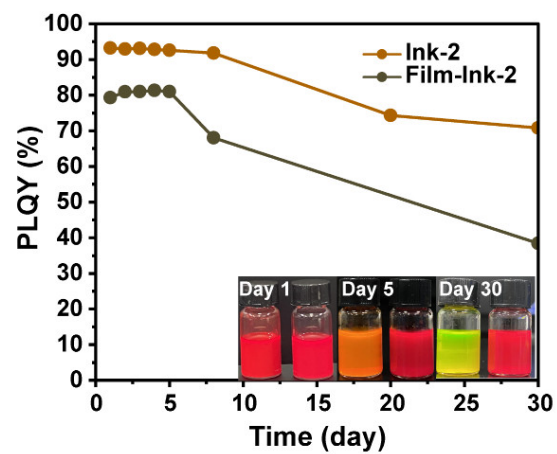

**Figure S5.** PL QY curves of Ink-1 and Ink-2 as a function of time under ambient conditions (25°C, 70-90% RH), and the inset shows photographs of these two inks.



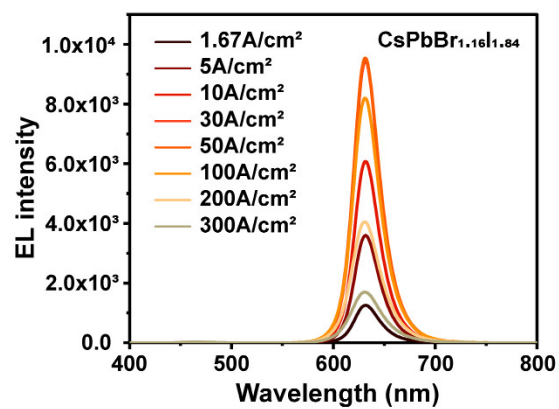

**Figure S6.** EL spectra of the red-emitting Mini-LED prepared by using CsPbBr<sub>1.16</sub>I<sub>1.84</sub> NCs at different current densities from 1.67 A/cm<sup>2</sup> to 300 A/cm<sup>2</sup>.

**Table S3.** Summary of optical properties and stability of red CsPb(Br/I)<sub>3</sub> NCs

| Perovskite                                                                                                   | Method                                          | PL Peak (nm) | FWHM (nm) | PLQY (%) | Stability                                                                                                                                                                                                                                                               | Ref. |
|--------------------------------------------------------------------------------------------------------------|-------------------------------------------------|--------------|-----------|----------|-------------------------------------------------------------------------------------------------------------------------------------------------------------------------------------------------------------------------------------------------------------------------|------|
| CsPbI <sub>1.5</sub> Br <sub>1.5</sub> film                                                                  | Hot Injection,<br>Thermal<br>Pressed            | 618          | N.A.      | N.A.     | 12 months in glovebox<br>with Ar                                                                                                                                                                                                                                        | 2    |
| CPBI-DMAPbX <sub>3</sub> -OcAm<br>NCs                                                                        | Hot Injection,<br>Post<br>Treatment             | 640          | N.A.      | 92       | UV irradiation (20 μw/cm <sup>2</sup> )<br>for 48 hours, maintain the<br>initial intensity of 90%,<br>with a blueshift of 10 nm                                                                                                                                         | 3    |
| KBr passivated CsPb(I <sub>x</sub> Br <sub>1-x</sub> ) <sub>3</sub> NCs                                      | Hot Injection,<br>Post<br>Treatment             | N.A          | N.A       | 95       | a colloidal stability of 1<br>year in ambient conditions<br>(25 °C and 40% humidity)                                                                                                                                                                                    | 4    |
| Silica-coated CPBI-Zn-K<br>NCs                                                                               | High-<br>temperature<br>Solid-state<br>Reaction | 631          | N.A       | 64.5     | maintain the initial<br>intensity of 41% when<br>heated from 303 K to 373<br>K                                                                                                                                                                                          | 5    |
| GAI passivated<br>FA <sub>x</sub> Cs <sub>1-x</sub> Pb (I <sub>y</sub> Br <sub>1-y</sub> ) <sub>3</sub> film | In Situ                                         | 692          | 32        | N.A      | The half-lifetime of the<br>GAI-modified PeLED was<br>563 min at an initial<br>luminance of 1000 cd m <sup>-2</sup>                                                                                                                                                     | 6    |
| Ni <sup>2+</sup> doping CsPbBrI <sub>2</sub>                                                                 | Hot Injection                                   | N.A          | N.A       | 81.05    | No phase separation<br>occurred during 4 months<br>of storage                                                                                                                                                                                                           | 7    |
| KBr passivated CsPbI <sub>3-x</sub> Br <sub>x</sub><br>NCs                                                   | Hot Injection                                   | 641          | N.A       | > 90     | UV irradiation (100<br>mw/cm <sup>2</sup> ) for 480 s, show a<br>blueshift of 3 nm                                                                                                                                                                                      | 8    |
| <b>This work</b>                                                                                             | Hot Injection                                   | 630          | 27        | ~100     | The half-lifetime of the<br>CsPbBr <sub>0.96</sub> I <sub>2.04</sub> /SiO <sub>2</sub> NC<br>films under UV irradiation<br>(150 mw/cm <sup>2</sup> ) was 445<br>min, the PLQY of which<br>still maintained 89% of<br>initial value after storage in<br>air for 100 days | -    |

## Reference

1. S. Shi, W. Bai, T. Xuan, T. Zhou, G. Dong and R.-J. Xie, *Small Methods*, 2021, **5**(3): 2000889.
2. T. Zhang, L. Zhang, G. L. Zhu, D. L. Cui, Q. L. Wang, G. Lian, Z. K. Zheng and H. H. Yu, *Advanced Materials Interfaces*, 2022, **9**, 10.
3. F. X. Xu, D. J. Chen, D. C. Huang, K. Y. Xu, S. S. Liang, J. Hu, X. Y. Zhang, L. Liu, F. B. Xiong and H. M. Zhu, *Journal of Physical Chemistry Letters*, 2022, **13**, 718-725.
4. Y. K. Wang, K. Singh, J. Y. Li, Y. T. Dong, X. Q. Wang, J. M. Pina, Y. J. Yu, R. Sabatini, Y. Liu, D. X. Ma, J. Liu, Z. K. Liu, Y. Y. Gao, O. Voznyy, W. L. Ma, M. K. Fung, L. S. Liao and E. H. Sargent, *Advanced Materials*, 2022, **34**, 6.
5. S. Y. Tian, X. F. Zhou, C. H. Bi, X. J. Sun, M. Q. Zhang, S. X. Yang and J. J. Tian, *Advanced Optical Materials*, 2022, **10**, 8.
6. Y. C. Ye, Y. Q. Li, Y. Tian, X. Y. Cai, Y. Shen, K. C. Shen, X. Y. Gao, F. Song, W. J. Wang and J. X. Tang, *Nanoscale*, 2021, **13**, 340-348.
7. S. P. Yang, H. W. Zhu, E. Z. Xu, J. C. Li, H. M. Yang, Y. Zhang, Z. F. Zhu and Y. Jiang, *Nanotechnology*, 2021, **32**, 335601.
8. J. N. Yang, Y. Song, J. S. Yao, K. H. Wang, J. J. Wang, B. S. Zhu, M. M. Yao, S. U. Rahman, Y. F. Lan, F. J. Fan and H. B. Yao, *Journal of the American Chemical Society*, 2020, **142**, 2956-2967.
